# Supplementary material for: A Bioinformatics Approach for Integrated Transcriptomic and Proteomic Comparative Analyses of Model and Non-sequenced Anopheline Vectors of Human Malaria Parasites
Source: PubMed Central journal article supplement — Mol Cell Proteomics. 2012 Oct 17;12(1):120–31. doi: 10.1074/mcp.M112.019596 (PMC3536893; doi:10.1074/mcp.m112.019596), 2012-10-17
Supplement: supp_M112.019596_mcp.M112.019596-5.pdf [file supp_M112.019596_mcp.M112.019596-5.pdf]

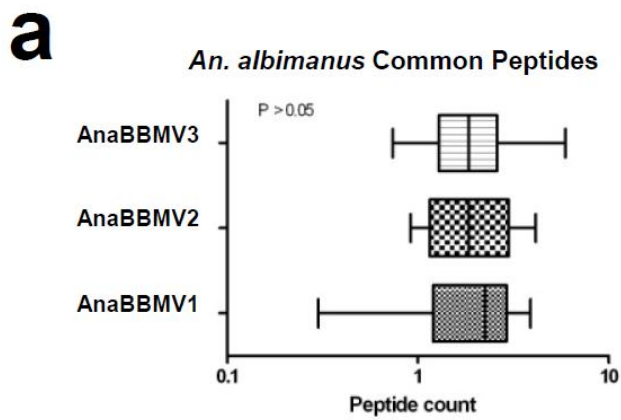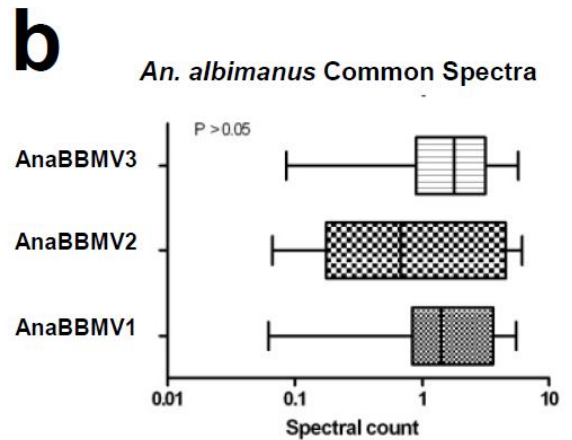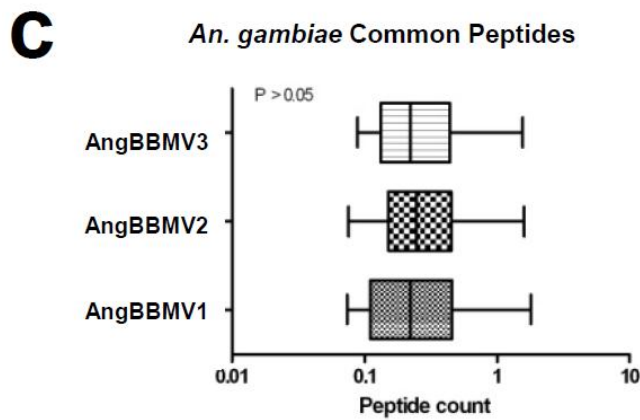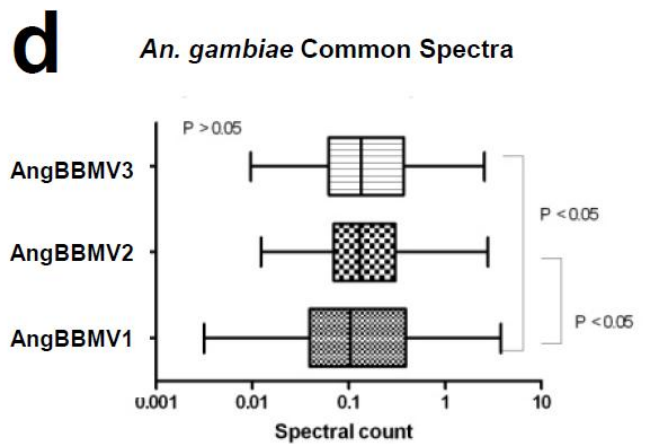

**Supplemental Figure S3. Reproducibility of MS/MS analyses across preparations from independent biological replicate samples.** Three biological replicates for both *An. albimanus* (AnaBBMV) and *An. gambiae* (AngBBMV) midgut preparations were analyzed by MS. S3a-d, peptides per identified protein for each replicate (a) and spectra per identified protein (b) for *albimanus*; peptides per identified protein for each replicate (c) and spectra per identified protein (d) for *gambiae*. Only proteins identified in all three preparations were considered. Statistical analysis was done by one-way ANOVA using the Kruskal-Wallis pairwise comparison method, followed by Dunn's pairwise comparison post test.
